# Supplementary material for: Organizational Responses to Public and Private Politics: An Analysis of Climate Change Activists and U.S. Oil and Gas Firms
Source: Atypon-hosted journal article supplement (doi:10.1287/orsc.2015.1008), 2015-10-05

## APPENDIX

**Table A1. Descriptive Statistics and Bivariate Correlations**

|           | <b>Variables</b>                          | <b>Mean</b> | <b>Std. Dev.</b> | <b>1</b> | <b>2</b> | <b>3</b> | <b>4</b> | <b>5</b> | <b>6</b> | <b>7</b> |
|-----------|-------------------------------------------|-------------|------------------|----------|----------|----------|----------|----------|----------|----------|
| <b>1</b>  | Carbon dioxide injection projects         | 0.226       | 1.486            | 1        |          |          |          |          |          |          |
| <b>2</b>  | Association affiliation                   | 0.010       | 0.122            | 0.159    | 1        |          |          |          |          |          |
| <b>3</b>  | Press releases                            | 0.010       | 0.148            | 0.116    | 0.493    | 1        |          |          |          |          |
| <b>4</b>  | Activist witnesses at hearings            | 7.185       | 11.460           | 0.059    | 0.049    | 0.021    | 1        |          |          |          |
| <b>5</b>  | Firm protests                             | 0.117       | 1.776            | 0.125    | 0.362    | 0.387    | 0.079    | 1        |          |          |
| <b>6</b>  | Democrat control                          | 0.547       | 0.048            | -0.036   | -0.055   | -0.063   | 0.191    | -0.037   | 1        |          |
| <b>7</b>  | UN Framework Convention on Climate Change | 0.427       | 0.495            | 0.063    | 0.070    | 0.066    | 0.187    | 0.074    | -0.669   | 1        |
| <b>8</b>  | EOR technology efficiency                 | 2574        | 1191             | 0.059    | 0.074    | 0.074    | 0.209    | 0.071    | -0.645   | 0.870    |
| <b>9</b>  | EPA complaints                            | 0.001       | 0.033            | 0.022    | -0.004   | -0.002   | -0.002   | -0.002   | 0.023    | -0.030   |
| <b>10</b> | Major industrial accidents                | 0.002       | 0.042            | 0.173    | 0.085    | 0.061    | 0.012    | 0.079    | 0.020    | -0.018   |
| <b>11</b> | Total congressional witnesses             | 63.072      | 82.502           | 0.044    | 0.083    | 0.044    | 0.328    | 0.051    | -0.041   | 0.320    |
| <b>12</b> | General EOR incentives                    | 0.628       | 0.751            | 0.319    | 0.242    | 0.189    | 0.176    | 0.201    | -0.421   | 0.704    |
| <b>13</b> | CO2-specific EOR incentives               | 0.027       | 0.175            | 0.374    | 0.217    | 0.187    | 0.108    | 0.273    | -0.117   | 0.193    |
| <b>14</b> | Total EOR projects                        | 0.682       | 3.977            | 0.462    | 0.251    | 0.133    | -0.001   | 0.230    | 0.011    | -0.021   |
| <b>15</b> | Joint venture EOR projects                | 0.099       | 1.512            | 0.226    | 0.328    | 0.244    | 0.016    | 0.407    | -0.063   | 0.062    |
| <b>16</b> | Return on assets                          | 3.269       | 71.916           | -0.006   | -0.004   | -0.003   | -0.017   | -0.003   | 0.018    | -0.019   |
| <b>17</b> | Research and Development to sales         | 2.425       | 62.109           | -0.011   | -0.007   | -0.005   | -0.029   | -0.005   | 0.028    | -0.041   |
| <b>18</b> | U.S. liquid oil reserves percentage       | 0.909       | 0.224            | -0.206   | -0.204   | -0.150   | 0.010    | -0.175   | 0.077    | -0.066   |
| <b>19</b> | U.S. liquid oil to gas production ratio   | 0.119       | 1.717            | -0.002   | -0.004   | -0.003   | -0.008   | -0.003   | -0.029   | 0.019    |
| <b>20</b> | Firm revenues                             | 3344695     | 23200000         | 0.318    | 0.240    | 0.173    | 0.130    | 0.192    | -0.158   | 0.202    |
| <b>21</b> | Crude oil to natural gas price ratio      | 2.076       | 0.544            | 0.017    | 0.002    | -0.009   | 0.701    | 0.039    | 0.386    | -0.228   |

|           | <b>8</b> | <b>9</b> | <b>10</b> | <b>11</b> | <b>12</b> | <b>13</b> | <b>14</b> | <b>15</b> | <b>16</b> | <b>17</b> | <b>18</b> | <b>19</b> | <b>20</b> |
|-----------|----------|----------|-----------|-----------|-----------|-----------|-----------|-----------|-----------|-----------|-----------|-----------|-----------|
| <b>8</b>  | 1        |          |           |           |           |           |           |           |           |           |           |           |           |
| <b>9</b>  | -0.033   | 1        |           |           |           |           |           |           |           |           |           |           |           |
| <b>10</b> | -0.023   | 0.175    | 1         |           |           |           |           |           |           |           |           |           |           |
| <b>11</b> | 0.434    | -0.026   | -0.013    | 1         |           |           |           |           |           |           |           |           |           |
| <b>12</b> | 0.759    | -0.018   | 0.014     | 0.465     | 1         |           |           |           |           |           |           |           |           |
| <b>13</b> | 0.173    | -0.006   | 0.051     | 0.043     | 0.551     | 1         |           |           |           |           |           |           |           |
| <b>14</b> | -0.025   | 0.028    | 0.246     | -0.010    | 0.203     | 0.254     | 1         |           |           |           |           |           |           |
| <b>15</b> | 0.063    | 0.014    | 0.028     | 0.029     | 0.225     | 0.285     | 0.430     | 1         |           |           |           |           |           |
| <b>16</b> | -0.028   | -0.001   | -0.002    | -0.020    | -0.022    | -0.005    | -0.007    | -0.003    | 1         |           |           |           |           |
| <b>17</b> | -0.054   | -0.002   | -0.003    | -0.033    | -0.041    | -0.011    | -0.012    | -0.005    | 0.280     | 1         |           |           |           |
| <b>18</b> | -0.073   | -0.052   | -0.100    | -0.004    | -0.277    | -0.316    | -0.238    | -0.149    | 0.013     | 0.012     | 1         |           |           |
| <b>19</b> | 0.020    | -0.002   | -0.002    | 0.005     | 0.008     | -0.003    | -0.005    | -0.003    | -0.001    | -0.002    | 0.012     | 1         |           |
| <b>20</b> | 0.185    | 0.061    | 0.110     | 0.091     | 0.401     | 0.337     | 0.363     | 0.178     | -0.065    | -0.111    | -0.446    | 0.002     | 1         |
| <b>21</b> | -0.175   | 0.006    | 0.008     | 0.038     | -0.118    | 0.025     | -0.008    | -0.021    | -0.008    | -0.001    | 0.026     | -0.007    | 0.072     |

**Table A2. First Stage of Heckman Two-stage Regression of CO<sub>2</sub>-EOR Injection**

| <b>Variables</b>                          | <b>Model 1</b>       |
|-------------------------------------------|----------------------|
| Firm revenues (logged)                    | 0.301***<br>(0.021)  |
| Crude oil to natural gas price ratio      | -0.265+<br>(0.142)   |
| Activist witnesses at hearings            | 0.012*<br>(0.005)    |
| Firm protests                             | 0.003<br>(0.033)     |
| General EOR incentives                    | 1.057***<br>(0.116)  |
| CO <sub>2</sub> -specific EOR incentives  | -0.281<br>(0.233)    |
| Democrat control                          | -2.233<br>(1.457)    |
| UN Framework Convention on Climate Change | -0.545**<br>(0.211)  |
| EOR technology efficiency                 | -0.000***<br>(0.000) |
| EPA complaints                            | -0.219<br>(0.782)    |
| Major industrial accidents                | 1.001<br>(0.725)     |
| Total congressional witnesses             | -0.003***<br>(0.001) |
| Return on assets                          | -0.005<br>(0.025)    |
| Research and development to sales         | -0.065<br>(0.060)    |
| U.S. liquid oil reserves percentage       | 0.290<br>(0.187)     |
| U.S. oil to gas production ratio          | 0.012<br>(0.016)     |
| Firm fixed effects                        | Yes                  |
| Constant                                  | -2.839**<br>(1.011)  |
| LR Chi squared                            | 1010.25***           |
| No. of Observations                       | 3310                 |

Standard errors in parentheses  
\*\*\* p<0.001, \*\* p<0.01, \* p<0.05, + p<0.10

**Table A3. Logit Analysis of CO<sub>2</sub>-EOR Injection at the EOR-project Level**

| <b>Variables</b>                                 | <b>Model 1</b>         | <b>Model 2</b>          | <b>Model 3</b>        |
|--------------------------------------------------|------------------------|-------------------------|-----------------------|
| Activist witnesses at hearings                   |                        | 0.026**<br>(0.009)      | 0.026**<br>(0.009)    |
| General EOR incentives                           | 0.539*<br>(0.251)      | 0.775**<br>(0.263)      | 0.775*<br>(0.372)     |
| CO <sub>2</sub> -specific EOR incentives         | 0.164<br>(0.570)       | -0.209<br>(0.577)       | -0.209<br>(0.640)     |
| EOR project age                                  | -0.113***<br>(0.018)   | -0.124***<br>(0.018)    | -0.124***<br>(0.025)  |
| Reservoir Porosity                               | -0.060**<br>(0.021)    | -0.059**<br>(0.021)     | -0.059<br>(0.054)     |
| Reservoir Permeability                           | -0.000<br>(0.000)      | -0.000<br>(0.000)       | -0.000<br>(0.000)     |
| Reservoir Depth (feet, logged)                   | 1.708***<br>(0.320)    | 1.795***<br>(0.324)     | 1.795**<br>(0.622)    |
| Oil Gravity °API                                 | -0.018<br>(0.018)      | -0.019<br>(0.018)       | -0.019<br>(0.029)     |
| Oil viscosity (in centipoise)                    | -0.002*<br>(0.001)     | -0.002*<br>(0.001)      | -0.002<br>(0.002)     |
| Oil temperature                                  | -0.008*<br>(0.004)     | -0.009*<br>(0.004)      | -0.009<br>(0.007)     |
| EOR project size (acres, logged)                 | 0.067<br>(0.061)       | 0.071<br>(0.062)        | 0.071<br>(0.124)      |
| Number of producing wells                        | 0.001***<br>(0.000)    | 0.001***<br>(0.000)     | 0.001<br>(0.001)      |
| Percent of wells injected                        | 0.202<br>(0.134)       | 0.205<br>(0.139)        | 0.205<br>(0.197)      |
| Previous production was primary                  | 1.068***<br>(0.257)    | 1.048***<br>(0.259)     | 1.048<br>(0.664)      |
| Project joint venture (binary)                   | 0.179<br>(0.919)       | 0.288<br>(0.932)        | 0.288<br>(1.601)      |
| State natural gas processing capacity            | 0.131***<br>(0.024)    | 0.132***<br>(0.025)     | 0.132*<br>(0.063)     |
| State population (logged)                        | -0.043<br>(0.162)      | -0.053<br>(0.165)       | -0.053<br>(0.482)     |
| State gross product per capita                   | -93.406***<br>(21.909) | -105.268***<br>(22.463) | -105.268*<br>(41.947) |
| Democrat control                                 | -1.665<br>(3.162)      | -6.273+<br>(3.506)      | -6.273*<br>(2.876)    |
| UN Framework Convention on Climate Change        | -0.257<br>(0.488)      | -0.232<br>(0.485)       | -0.232<br>(0.474)     |
| EOR technology efficiency                        | 0.001***<br>(0.000)    | 0.001***<br>(0.000)     | 0.001***<br>(0.000)   |
| Total congressional witnesses                    | -0.003<br>(0.002)      | -0.004+<br>(0.002)      | -0.004<br>(0.002)     |
| Constant                                         | -14.121**<br>(4.411)   | -11.520*<br>(4.524)     | -11.520<br>(9.996)    |
| Geological formation controls                    | Yes                    | Yes                     | Yes                   |
| Firm fixed effects                               | Yes                    | Yes                     | Yes                   |
| Firm cluster                                     | No                     | No                      | Yes                   |
| LR chi squared (Wald chi 2 for cluster analysis) | 1863.13***             | 1872.81***              | 434.73***             |

|                                            |      |      |      |
|--------------------------------------------|------|------|------|
| No. of Observations                        | 2311 | 2311 | 2311 |
| Standard errors in parentheses             |      |      |      |
| *** p<0.001, ** p<0.01, * p<0.05, + p<0.10 |      |      |      |

**Table A4. Logit Analysis of EOR Project Profitability (1=yes, 0=no)**

| Variable                                   | Model 1             | Model 2              |
|--------------------------------------------|---------------------|----------------------|
| CO <sub>2</sub> injection                  |                     | -1.353***<br>(0.204) |
| EOR project age                            | 0.140***<br>(0.015) | 0.135***<br>(0.015)  |
| General EOR incentives                     | -0.234<br>(0.229)   | 0.021<br>(0.240)     |
| CO <sub>2</sub> -specific EOR incentives   | 0.474<br>(0.520)    | 0.559<br>(0.512)     |
| Reservoir porosity                         | 0.038**<br>(0.013)  | 0.038**<br>(0.013)   |
| Reservoir permeability                     | -0.000<br>(0.000)   | -0.000<br>(0.000)    |
| Reservoir depth (feet, logged)             | -0.016<br>(0.110)   | 0.180<br>(0.116)     |
| Oil gravity °API                           | -0.026**<br>(0.008) | -0.020*<br>(0.009)   |
| Oil viscosity (in centipoise)              | -0.000<br>(0.000)   | -0.000<br>(0.000)    |
| Oil temperature                            | -0.000<br>(0.001)   | -0.000<br>(0.001)    |
| EOR project size (acres, logged)           | 0.290***<br>(0.048) | 0.267***<br>(0.050)  |
| Number of producing wells                  | 0.000<br>(0.001)    | 0.001<br>(0.001)     |
| Percent of wells injected                  | 0.019<br>(0.112)    | 0.094<br>(0.161)     |
| Previous production was primary            | -0.320*<br>(0.136)  | -0.355*<br>(0.140)   |
| Geological formation controls              | Yes                 | Yes                  |
| Year fixed effects                         | Yes                 | Yes                  |
| Constant                                   | -1.129<br>(0.913)   | -2.702**<br>(0.975)  |
| LR chi-squared                             | 543.72***           | 589.72***            |
| No. of observations                        | 2424                | 2424                 |
| Standard errors in parentheses             |                     |                      |
| *** p<0.001, ** p<0.01, * p<0.05, + p<0.10 |                     |                      |

**Table A5. Linear Regression of Activists' Influence on Firm Lobbying (via political contributions)**

| Variables                                 | Model 1              | Model 2              | Model 3             |
|-------------------------------------------|----------------------|----------------------|---------------------|
| Activist witnesses at hearings            |                      | 0.008<br>(0.008)     | 0.001<br>(0.006)    |
| Firm protests                             |                      |                      | 0.353***<br>(0.019) |
| General EOR incentives                    | -0.086<br>(0.165)    | -0.120<br>(0.168)    | -0.039<br>(0.140)   |
| CO2-specific EOR incentives               | -0.330<br>(0.218)    | -0.349<br>(0.218)    | -0.477**<br>(0.182) |
| Democrat control                          | 4.646**<br>(1.452)   | 1.063<br>(3.597)     | 2.435<br>(2.995)    |
| UN Framework Convention on Climate Change | Dropped              | Dropped              | Dropped             |
| EOR technology efficiency                 | 0.000<br>(0.000)     | 0.000<br>(0.000)     | -0.000<br>(0.000)   |
| EPA complaints                            | Dropped              | Dropped              | Dropped             |
| Major industrial accidents                | 2.325+<br>(1.240)    | 2.301+<br>(1.240)    | 0.611<br>(1.036)    |
| Total congressional witnesses             | 0.001<br>(0.001)     | 0.001<br>(0.001)     | 0.001<br>(0.001)    |
| Firm revenues (logged)                    | 0.036<br>(0.049)     | 0.018<br>(0.051)     | 0.038<br>(0.043)    |
| Joint venture EOR projects                | -0.139***<br>(0.031) | -0.140***<br>(0.031) | 0.080**<br>(0.028)  |
| Return on assets                          | 0.023<br>(0.400)     | 0.017<br>(0.400)     | 0.021<br>(0.333)    |
| Research and development to sales         | 1.450<br>(3.374)     | 1.595<br>(3.376)     | 1.016<br>(2.810)    |
| U.S. liquid oil reserves percentage       | 0.439<br>(0.359)     | 0.425<br>(0.359)     | 0.042<br>(0.300)    |
| U.S. liquid oil to gas production ratio   | 0.002<br>(0.015)     | 0.002<br>(0.015)     | 0.001<br>(0.013)    |
| Firm fixed effects                        | Yes                  | Yes                  | Yes                 |
| Constant                                  | -2.916**<br>(1.095)  | -1.251<br>(1.880)    | -1.427<br>(1.565)   |
| F statistic                               | 4.82***              | 4.55***              | 30.49***            |
| No. of Observations                       | 1055                 | 1055                 | 1055                |

Standard errors in parentheses  
\*\*\* p<0.001, \*\* p<0.01, \* p<0.05, + p<0.10

**Table A6. Linear Regression of Activists' Influence on Firm Lobbying (via congressional witnesses)**

| Variables                                  | Model 1              | Model 2              | Model 3              |
|--------------------------------------------|----------------------|----------------------|----------------------|
| Activist witnesses at hearings             |                      | 0.001***<br>(0.000)  | 0.001***<br>(0.000)  |
| Firm protests                              |                      |                      | 0.014***<br>(0.001)  |
| General EOR incentives                     | 0.028***<br>(0.007)  | 0.036***<br>(0.007)  | 0.034***<br>(0.007)  |
| CO2-specific EOR incentives                | 0.093***<br>(0.014)  | 0.079***<br>(0.014)  | 0.062***<br>(0.014)  |
| Democrat control                           | -0.323***<br>(0.061) | -0.486***<br>(0.068) | -0.484***<br>(0.066) |
| UN Framework Convention on Climate Change  | 0.046***<br>(0.010)  | 0.042***<br>(0.010)  | 0.043***<br>(0.010)  |
| EOR technology efficiency                  | -0.000***<br>(0.000) | -0.000***<br>(0.000) | -0.000***<br>(0.000) |
| EPA complaints                             | -0.031<br>(0.058)    | -0.033<br>(0.057)    | -0.035<br>(0.056)    |
| Major industrial accidents                 | 0.194***<br>(0.041)  | 0.195***<br>(0.041)  | 0.179***<br>(0.040)  |
| Total congressional witnesses              | 0.000***<br>(0.000)  | 0.000***<br>(0.000)  | 0.000***<br>(0.000)  |
| Firm revenues (logged)                     | 0.003+<br>(0.002)    | 0.000<br>(0.002)     | -0.000<br>(0.002)    |
| Joint venture EOR projects                 | 0.012***<br>(0.002)  | 0.012***<br>(0.002)  | 0.008***<br>(0.002)  |
| Return on assets                           | 0.001<br>(0.003)     | 0.001<br>(0.003)     | 0.001<br>(0.003)     |
| Research and development to sales          | 0.004<br>(0.008)     | 0.002<br>(0.008)     | 0.002<br>(0.008)     |
| U.S. liquid oil reserves percentage        | -0.018<br>(0.018)    | -0.020<br>(0.018)    | -0.013<br>(0.018)    |
| U.S. liquid oil to gas production ratio    | 0.001<br>(0.001)     | 0.001<br>(0.001)     | 0.001<br>(0.001)     |
| Firm fixed effects                         | Yes                  | Yes                  | Yes                  |
| Constant                                   | 0.215***<br>(0.046)  | 0.340***<br>(0.052)  | 0.342***<br>(0.051)  |
| F statistic                                | 32.55***             | 32.64***             | 38.29***             |
| No. of Observations                        | 3449                 | 3449                 | 3449                 |
| Standard errors in parentheses             |                      |                      |                      |
| *** p<0.001, ** p<0.01, * p<0.05, + p<0.10 |                      |                      |                      |

**Figure A1: Activist Witnesses and Wells Injected with CO<sub>2</sub>-EOR**

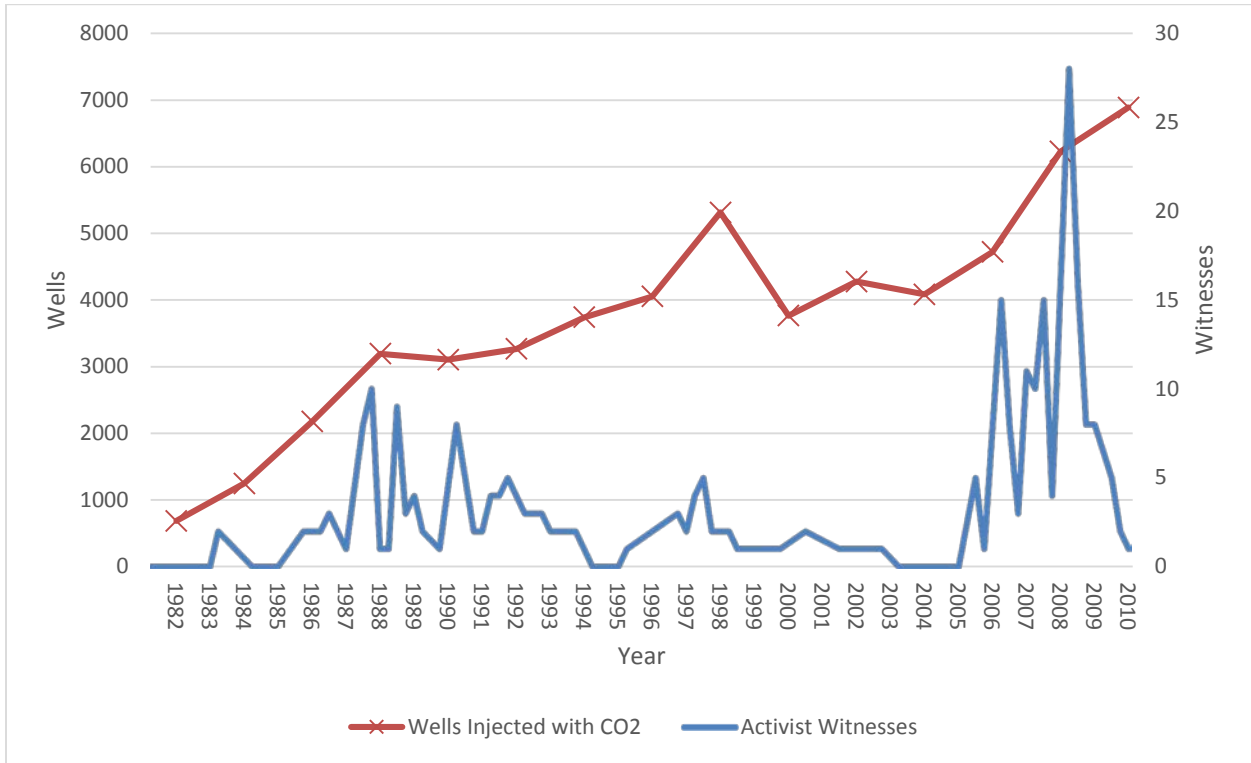

Supplement: orsc.2015.1008-sm-appendix_final.pdf [file orsc.2015.1008-sm-appendix_final.pdf]
